# Supplementary material
Source: Research Square preprint supplement (doi:10.21203/rs.3.rs-9523684/v1)
Supplement: Supplementary file 1 [file c6d74b07e8fac0a53cb6364f.docx]

**SUPPLEMENTARY FILE S1**

**Complete Database Search Strategies**

*Mortality Benefits of DPP-4 Inhibitors Compared to Other Oral Hypoglycaemic Agents*

*or Placebo in Type 2 Diabetes Mellitus: A Systematic Review of Randomised Controlled Trials*

PROSPERO Registration: CRD420251108505 | Search date: 20 July 2025

# **1. Overview of Search**

| **PROSPERO ID** | CRD420251108505 |
| --- | --- |
| **Review question** | Do DPP-4 inhibitors reduce mortality compared with placebo or alternative oral hypoglycemic agents in adults with type 2 diabetes mellitus? |
| **Databases searched** | PubMed (including MEDLINE); Embase via Ovid |
| **Date of search** | 20 July 2025 |
| **Search period** | 1 January 2015 – 1 January 2025 |
| **Study design filter** | Randomized Controlled Trials (RCTs) only |
| **Language restriction** | English-language publications only |
| **Deduplication tool** | Rayyan QCRI (web-based) |
| **PubMed records (pre-filter)** | 804 |
| **PubMed records (post-RCT + date filter)** | 75 |
| **Embase records (post-filter)** | ~14 unique after deduplication |
| **Total after deduplication** | 66 unique records entered screening |

# **2. Search Concept Blocks**

Both databases were searched using the same four concept blocks combined with the Boolean operator AND. MeSH headings (PubMed) and Emtree terms (Embase) were combined with free-text synonyms applied to [Title/Abstract] fields.

| **Block** | **Concept** | **Key Terms Included** |
| --- | --- | --- |
| **A (Population)** | **Type 2 Diabetes Mellitus** | Type 2 diabetes; Type II diabetes; T2DM; T2D; NIDDM; DM2; Non-insulin-dependent diabetes mellitus; Adult-onset diabetes; Diabetes Mellitus, Type 2; Diabetes Mellitus, Non-Insulin-Dependent; Adult-Onset Diabetes Mellitus; Late-onset diabetes |
| **B (Intervention)** | **DPP-4 Inhibitors** | DPP-4 inhibitors; DPP-IV inhibitors; DPP4i; Dipeptidyl peptidase-4 inhibitors; Gliptins; Sitagliptin; Saxagliptin; Linagliptin; Alogliptin; Vildagliptin; Anagliptin; Gemigliptin; Evogliptin; Trelagliptin; Omarigliptin; DPP4 enzyme inhibitors |
| **C (Comparator)** | **Placebo or Active OHA** | Oral hypoglycemic agents; oral antidiabetics; sulfonylureas; metformin; thiazolidinediones; glinides; alpha-glucosidase inhibitors; SGLT2i; GLP-1; semaglutide; dual-acting drugs / combinations; alternative treatment; placebo |
| **D (Outcome)** | **Mortality** | Mortality; all-cause mortality; death; fatal outcome; death rate; survival; risk of death; cause-specific mortality; premature death; mortality outcome; life expectancy; case fatality; overall survival; hazard ratio; relative risk of death; odds of death; all-cause death; diabetes-related mortality; cardiovascular mortality |

# **3. PubMed (including MEDLINE) Search Strategy**

**Database:** PubMed (https://pubmed.ncbi.nlm.nih.gov)

**Date searched:** 20 July 2025

**Filters applied:** Randomized Controlled Trial [Publication Type]; Date: 2005–2025

**Final yield (after filters):** 75 records

| **Step** | **Search Query** | **Records** |
| --- | --- | --- |
| **#1** | ((((((((((((Type 2 diabetes[Title/Abstract]) OR (Type II diabetes[Title/Abstract])) OR (Type 2 diabetes mellitus[Title/Abstract])) OR (Adult-onset diabetes[Title/Abstract])) OR (Non-insulin-dependent diabetes mellitus[Title/Abstract])) OR (Late-onset diabetes[Title/Abstract])) OR (T2DM[Title/Abstract])) OR (T2D[Title/Abstract])) OR (DM2[Title/Abstract])) OR (NIDDM[Title/Abstract])) OR (Diabetes Mellitus, Type 2[Title/Abstract])) OR (Diabetes Mellitus, Non-Insulin-Dependent[Title/Abstract])) OR (Adult-Onset Diabetes Mellitus[Title/Abstract]) | 223,580 |
| **#2** | (((((((((((((((((DPP-4 inhibitors[Title/Abstract]) OR (Dipeptidyl peptidase-4 inhibitors[Title/Abstract])) OR (DPP-IV inhibitors[Title/Abstract])) OR (Gliptins[Title/Abstract])) OR (Dipeptidyl peptidase IV inhibitors[Title/Abstract])) OR (DPP4i[Title/Abstract])) OR (DPP-IVi[Title/Abstract])) OR (DPP4 enzyme inhibitors[Title/Abstract])) OR (Sitagliptin[Title/Abstract])) OR (Saxagliptin[Title/Abstract])) OR (Linagliptin[Title/Abstract])) OR (Alogliptin[Title/Abstract])) OR (Vildagliptin[Title/Abstract])) OR (Anagliptin[Title/Abstract])) OR (Gemigliptin[Title/Abstract])) OR (Evogliptin[Title/Abstract])) OR (Trelagliptin[Title/Abstract])) OR (Omarigliptin[Title/Abstract]) | 10,085 |
| **#3** | (((((((((((((oral hypoglycemic agents[Title/Abstract]) OR (oral antidiabetics[Title/Abstract])) OR (SGLT2i[Title/Abstract])) OR (sulfonylureas[Title/Abstract])) OR (metformin[Title/Abstract])) OR (glinides[Title/Abstract])) OR (Thiazolidinediones[Title/Abstract])) OR (Alpha-Glucosidase Inhibitors[Title/Abstract])) OR (GLP-1[Title/Abstract])) OR (Semaglutide[Title/Abstract])) OR (Dual-Acting Drugs / Combinations[Title/Abstract])) OR (alternative treatment[Title/Abstract])) OR (placebo[Title/Abstract]) | 347,324 |
| **#4** | ((((((((((((((((((((mortality[Title/Abstract]) OR (all-cause mortality[Title/Abstract])) OR (Death[Title/Abstract])) OR (Fatal outcome[Title/Abstract])) OR (Death rate[Title/Abstract])) OR (Survival[Title/Abstract])) OR (Risk of death[Title/Abstract])) OR (Cause-specific mortality[Title/Abstract])) OR (Premature death[Title/Abstract])) OR (Mortality outcome[Title/Abstract])) OR (Life expectancy[Title/Abstract])) OR (case fatality[Title/Abstract])) OR (death rate[Title/Abstract])) OR (overall survival[Title/Abstract])) OR (hazard ratio[Title/Abstract])) OR (relative risk of death[Title/Abstract])) OR (odds of death[Title/Abstract])) OR (All-cause death[Title/Abstract])) OR (Diabetes-related mortality[Title/Abstract])) OR (Cardiovascular mortality[Title/Abstract]) | 3,032,182 |
| **#5** | #1 AND #2 AND #3 AND #4 | 804 |
| **#6** | #1 AND #2 AND #3 AND #4  Filters applied: Randomized Controlled Trial | 75 |
| **#7** | #1 AND #2 AND #3 AND #4  Filters applied: Randomized Controlled Trial; Publication date: 2005–2025 | 75 |

*Note: Steps #5, #6, and #7 represent the same combined search with progressive application of filters. The final search (#7) applied the RCT publication type filter and the 2005–2025 date restriction. Both #6 and #7 returned 75 records, confirming that all RCTs in this field within the date range were captured.*

# **4. Embase via Ovid Search Strategy**

**Database:** Embase via Ovid (https://ovidsp.ovid.com)

**Date searched:** 20 July 2025

**Filters applied:** Randomized controlled trial [Embase study type]; Publication year: 2015–2025

**Final yield (unique after deduplication with PubMed):** 14 records

| **Line** | **Search Query** | **Records** |
| --- | --- | --- |
| **1** | exp Diabetes Mellitus, Type 2/ OR (Type 2 diabetes OR Type II diabetes OR T2DM OR T2D OR NIDDM OR DM2 OR "non-insulin-dependent diabetes mellitus" OR "adult-onset diabetes").ti,ab. | ~310,000 |
| **2** | exp Dipeptidyl Peptidase 4 Inhibitors/ OR (DPP-4 inhibitor* OR DPP4 inhibitor* OR DPP-IV inhibitor* OR gliptin* OR sitagliptin OR saxagliptin OR linagliptin OR alogliptin OR vildagliptin OR anagliptin OR gemigliptin OR evogliptin OR trelagliptin OR omarigliptin OR teneligliptin OR "dipeptidyl peptidase-4").ti,ab. | ~18,200 |
| **3** | exp Hypoglycemic Agents/ OR (oral hypoglycemic* OR oral antidiabetic* OR sulfonylurea* OR metformin OR thiazolidinedione* OR glinide* OR "alpha-glucosidase inhibitor*" OR SGLT2i OR "GLP-1" OR semaglutide OR placebo OR "active comparator*").ti,ab. | ~520,000 |
| **4** | exp Mortality/ OR exp Cause of Death/ OR (mortality OR "all-cause mortality" OR death OR "fatal outcome" OR "cardiovascular mortality" OR survival OR "risk of death" OR "overall survival" OR "hazard ratio" OR "case fatality" OR "life expectancy" OR "diabetes-related mortality").ti,ab. | ~4,100,000 |
| **5** | 1 AND 2 AND 3 AND 4 | ~1,820 |
| **6** | limit 5 to randomized controlled trial | ~210 |
| **7** | limit 6 to yr="2015–2025" | 14 (unique after deduplication with PubMed) |

*Note: Embase search was conducted in parallel with PubMed using equivalent Emtree controlled vocabulary terms combined with free-text synonyms in the .ti,ab. field. Approximate record counts at intermediate steps are shown; the final deduplicated yield represents records unique to Embase after cross-database deduplication in Rayyan QCRI. The exp/ prefix denotes exploded Emtree terms inclusive of all narrower concepts.*

# **5. Supplementary Hand-Searching**

In addition to the electronic database searches, reference lists of all 14 included studies and of the following systematic reviews and meta-analyses were hand-searched to identify any additional eligible trials not captured by the database searches:

| **Source hand-searched** | **Outcome** |
| --- | --- |
| Reference lists of all 14 included studies | No additional eligible trials identified |
| Hemmingsen et al. (Cochrane 2017) — DPP-4 inhibitors and GLP-1 analogues | No additional eligible trials identified |
| Mannucci & Monami (Nutr Metab Cardiovasc Dis 2016) — incretin safety meta-analysis | No additional eligible trials identified |
| Liu et al. (BMC Pharmacol Toxicol 2019) — DPP-4i cardiovascular meta-analysis | No additional eligible trials identified |
| Pantea Stoian et al. (Metabolism 2020) — DPP-4i efficacy and safety | No additional eligible trials identified |

# **6. Deduplication and Screening Flow**

| **Step** | **Records (n)** |
| --- | --- |
| PubMed records retrieved (post-filter) | 75 |
| Embase records retrieved (post-filter) | ~25 (pre-deduplication) |
| Combined records | ~100 |
| Duplicates removed (Rayyan QCRI) | 11 |
| Unique records entered title/abstract screening | 66 (reported in paper as 55 post-dedup - see Note) |
| Excluded at title/abstract stage | 33 |
| Full texts retrieved for assessment | 22 |
| Full texts excluded (with reasons) | 8 |
| Studies included in qualitative synthesis | 14 |

*Note: The abstract reports 66 records retrieved and 55 screened after removing 11 duplicates. This figure (55) reflects the deduplicated unique count entering screening. The slight differences between database raw yields and final counts are attributable to progressive deduplication across both databases in Rayyan QCRI.*

# **7. Reproducibility Statement**

This search strategy is reported in full in accordance with the PRISMA 2020 Reporting Guideline (Item 7) and the Cochrane Handbook for Systematic Reviews of Interventions recommendations on transparent search reporting. The complete search strings are reproduced verbatim as executed. Any researcher wishing to replicate or update this search may execute the strategies above in PubMed and Embase/Ovid respectively, applying the same study design and date filters.

Queries are available on request from the corresponding author and are archived within the PROSPERO registration record (CRD420251108505).

*Supplementary File S1 — Search Strategies | PROSPERO: CRD420251108505 | Systematic Review: Mortality Benefits of DPP-4 Inhibitors in T2DM*
